# Supplementary material
Source: PubMed Central journal article supplement (PMC4769119)
Supplement: NIHMS714459-supplement-Supplemental_Tables_1-5.pdf [file NIHMS714459-supplement-Supplemental_Tables_1-5.pdf]

**Table S1:** ICD-9 and CPT codes used to exclude admissions of patients with pre-existing chronic kidney disease.

| ICD-9 Codes |        |        | ICD-9 E/V Codes | CPT Codes |
|-------------|--------|--------|-----------------|-----------|
| 38.95       | 404.12 | 583.2  | E870.2          | 0505F     |
| 39.27       | 404.13 | 583.4  | E871.2          | 0507F     |
| 39.42       | 404.90 | 583.6  | E879.1          | 3066F     |
| 39.43       | 404.91 | 583.7  | V42.0           | 36145     |
| 39.95       | 404.92 | 583.81 | V45.1           | 36800     |
| 54.98       | 404.93 | 583.89 | V45.11          | 36810     |
| 55.52       | 446.4  | 583.9  | V45.12          | 4052F     |
| 55.53       | 458.21 | 585.1  | V45.73          | 4053F     |
| 55.6        | 572.4  | 585.2  | V56.0           | 4054F     |
| 189.0       | 581.0  | 585.3  | V56.1           | 4055F     |
| 250.41      | 581.1  | 585.4  | V56.2           | 90935     |
| 270.0       | 581.2  | 585.5  | V56.32          | 90937     |
| 285.21      | 581.3  | 585.6  | V56.8           | 90945     |
| 403.00      | 581.81 | 585.9  |                 | 90947     |
| 403.01      | 581.89 | 589.1  |                 | 90967     |
| 403.10      | 581.9  | 710.0  |                 | 90968     |
| 403.11      | 582.0  | 753.14 |                 | 90969     |
| 403.90      | 582.1  | 753.15 |                 | 90970     |
| 403.91      | 582.2  | 756.71 |                 | 90999     |
| 404.00      | 582.4  | 792.5  |                 | 50200     |
| 404.01      | 582.81 | 996.56 |                 |           |
| 404.02      | 582.89 | 996.68 |                 |           |
| 404.03      | 582.9  | 996.73 |                 |           |
| 404.10      | 583.0  | 996.81 |                 |           |
| 404.11      | 583.1  |        |                 |           |

**Table S2:** Nephrotoxic medications classified by their relative contribution to the development of AKI: Group 1 if nephrotoxic as single agent or Group 2 if nephrotoxic in at-risk clinical situations or in conjunction with additional agent(s).

| <b>Group 1</b>           | <b>Group 2</b>                |
|--------------------------|-------------------------------|
| Acyclovir                | Accupril                      |
| Amikacin                 | Aminocaproic Acid             |
| Amphotericin B Liposomal | Aspirin                       |
| Cidofovir                | Bevacizumab                   |
| Cisplatin                | Bumetanide                    |
| Colistimethate Sodium    | Celecoxib                     |
| Cyclophosphamide         | Chlorothiazide                |
| Cyclosporine             | Daptomycin                    |
| Fludarabine Phosphate    | Enalapril                     |
| Gentamicin               | Enalaprilat                   |
| Hydroxyurea              | Etravirine                    |
| Ibuprofen                | Everolimus                    |
| Ifosfamide               | Foscarnet                     |
| Imatinib Mesylate        | Furosemide                    |
| Indomethacin             | Gabapentin                    |
| IVIG                     | Ganciclovir                   |
| Ketorolac Tromethamine   | Glipizide                     |
| Lomustine                | Hydrochlorothiazide           |
| Meloxicam                | Linezolid                     |
| Mercaptopurine           | Lisinopril                    |
| Mesalamine               | Lithium Carbonate             |
| Methotrexate             | Losartan                      |
| Naproxen                 | Methocarbamol                 |
| Neomycin                 | Mitoxantrone Hcl              |
| Sirolimus                | Nelarabine                    |
| Streptomycin             | Phenylephrine                 |
| Tacrolimus               | Piperacillin/Tazobactam       |
| Tobramycin               | Ramipril                      |
| Vancomycin               | Spirolactone                  |
|                          | Trimethoprim/Sulfamethoxazole |
|                          | Val-Acyclovir                 |
|                          | Val-Ganciclovir               |
|                          | Valsartan                     |

**Table S3.** Data conversions to allow for analysis. The extracted lab values and the numeric conversions used in this study are listed below.

| <b>Lab</b> | <b>Stated value</b> | <b>Value assigned for lab measurement</b> | <b>Units</b>       |
|------------|---------------------|-------------------------------------------|--------------------|
| Creatinine | < 0.1               | 0.1                                       | mg/dL              |
| Creatinine | < 0.2               | 0.2                                       | mg/dL              |
| Hematocrit | < 15                | 15                                        | %                  |
| Hematocrit | > 65                | 65                                        | %                  |
| Platelets  | < 5                 | 5                                         | $10^3/\mu\text{L}$ |
| Platelets  | < 10                | 10                                        | $10^3/\mu\text{L}$ |

**Table S4:** AKI definition for staging evaluated patients who met minimum criteria for acute kidney injury during their admission. Urine output data were unreliable and not used for this study. Conversion factor for creatinine in mg/dL to  $\mu\text{mol/L}$ , x88.4.

|                      | <b>Serum Creatinine Change</b>  | <b>Serum Creatinine Value (mg/dl)</b> |
|----------------------|---------------------------------|---------------------------------------|
| <b>KDIGO Stage 1</b> | $\geq 1.5$ - to 2-fold increase | Increase of $\geq 0.3$                |
| <b>KDIGO Stage 2</b> | $\geq 2$ - to 3-fold increase   |                                       |
| <b>KDIGO Stage 3</b> | $\geq 3$ -fold increase         | $\geq 4$                              |

**Table S5.** Discharge diagnoses and mortality. The five most frequent primary discharge diagnoses are listed for the subgroups in this study. Note the individuals in Stages 1, 2, and 3 are subsets of the AKI cohort.

|                                                                          | <b>Most Frequent Primary Discharge Diagnosis<sup>1</sup></b>                                                                                                                                                                                                                                                                                                                                                              | <b>In Hospital Mortality<sup>1</sup></b> |
|--------------------------------------------------------------------------|---------------------------------------------------------------------------------------------------------------------------------------------------------------------------------------------------------------------------------------------------------------------------------------------------------------------------------------------------------------------------------------------------------------------------|------------------------------------------|
| <b>Not Evaluated (N=11,540)</b><br><b>9593 (83%) with data available</b> | <ol style="list-style-type: none"> <li>1. Acute Appendicitis- 325 (2.8%)</li> <li>2. Hypertrophy of Tonsils with Adenoids- 314 (2.7%)</li> <li>3. Pneumonia, Organism Unspecified- 312 (2.7%)</li> <li>4. Other Convulsions- 268 (2.3%)</li> <li>5. Acute RSV Bronchiolitis- 253 (2.2%)</li> </ol>                                                                                                                        | 5 (0.04%)                                |
| <b>Evaluated (N=2374)</b><br><b>2305 (97%) with data available</b>       | <ol style="list-style-type: none"> <li>1. Dehydration- 84 (3.5%)</li> <li>2. Encounter for Antineoplastic Chemotherapy- 79 (3.3%)</li> <li>3. Idiopathic Scoliosis- 63 (2.7%)</li> <li>4. Fever, Unspecified- 57 (2.4%)</li> <li>5. Pneumonia, Organism Unspecified- 47 (2.0%)</li> </ol>                                                                                                                                 | 5 (0.2%)                                 |
| <b>No AKI (N=1652)</b><br><b>1604 (97%) with data available</b>          | <ol style="list-style-type: none"> <li>1. Idiopathic Scoliosis- 58 (3.5%)</li> <li>2. Dehydration- 51 (3.1%)</li> <li>3. Encounter for Antineoplastic Chemotherapy- 39 (2.4%)</li> <li>4. Constipation- 37 (2.2%)</li> <li>5. Pneumonia, Organism Unspecified- 34 (2.1%)</li> </ol>                                                                                                                                       | 1 (0.06%)                                |
| <b>AKI (N=722)</b><br><b>701 (97%) with data available</b>               | <ol style="list-style-type: none"> <li>1. Encounter for Antineoplastic Chemotherapy- 40 (5.5%)</li> <li>2. Dehydration- 33 (4.6%)</li> <li>3. Fever, Unspecified- 24 (3.3%)</li> <li>4. Diabetes Mellitus Type 1 with Ketoacidosis- 22 (3.0%)</li> <li>5. Congenital Pyloric Stenosis- 17 (2.4%)</li> </ol> Acute febrile mucocutaneous lymph node synd.- 17 (2.4%)                                                       | 4 (0.6%)                                 |
| <b>Stage 1 (N=443)</b><br><b>427 (96%) with data available</b>           | <ol style="list-style-type: none"> <li>1. Encounter for Antineoplastic Chemotherapy- 22 (5.0%)</li> <li>2. Diabetes Mellitus Type 1 with Ketoacidosis- 16 (3.6%)</li> <li>3. Dehydration- 14 (3.2%)</li> </ol> Acute febrile mucocutaneous lymph node synd.- 14 (3.2%)<br><ol style="list-style-type: none"> <li>5. Pneumonia, Organism Unspecified- 11 (2.5%)</li> <li>Congenital Pyloric Stenosis- 11 (2.5%)</li> </ol> | 1 (0.2%)                                 |
| <b>Stage 2 (N=199)</b><br><b>194 (97%) with data available</b>           | <ol style="list-style-type: none"> <li>1. Encounter for Antineoplastic Chemotherapy- 16 (8.0%)</li> <li>2. Dehydration- 10 (5.0%)</li> <li>3. Fever, Unspecified- 9 (4.5%)</li> <li>4. Diabetes Mellitus Type 1 with Ketoacidosis- 6 (3.0%)</li> <li>5. ALL without Remission- 5 (2.5%)</li> </ol> Neutropenia, Unspecified- 5 (2.5%)<br>Failure to Thrive- 5 (2.5%)                                                      | 0 (0.0%)                                 |
| <b>Stage 3 (N=80)</b><br><b>77 (96%) with data available</b>             | <ol style="list-style-type: none"> <li>1. Dehydration- 9 (11.3%)</li> <li>2. Acute Kidney Failure, Unspecified- 7 (8.8%)</li> <li>3. Fever, Unspecified- 6 (7.5%)</li> <li>4. Bloodstream infection due to central venous cath- 5 (6.3%)</li> <li>5. [All other diagnoses in ≤2 individuals]</li> </ol>                                                                                                                   | 3 (3.8%)                                 |

<sup>1</sup>Numbers for diagnoses are given as Number (Percent of total in selected cohort).
